# Supplementary material for: Metabolome analysis reveals a diversity of cancer tissues in advanced epithelial ovarian cancer
Source: Cancer Cell Int. 2021 Jun 16;21:314. doi: 10.1186/s12935-021-02014-7 (PMC8207638; doi:10.1186/s12935-021-02014-7)
Supplement: Supplementary file 2 — Additional file 2: Table S2. Metabolic parameters based on the 116 compounds. [file 12935_2021_2014_MOESM2_ESM.xlsx]

## Sheet: Sheet1
Metabolic parameters	Case1-PC	Case2-PC	Case3-PC	Case4-PC	Case5-PC	Case1-OMC	Case2-OMC	Case3-OMC	Case4-OMC	Case5-OMC	p-value (PCs vs. OMCs)
Adenylate Energy Charge	0.183699	0.255875	0.557336	0.864828	0.524304	0.345902	0.116256	0.797756	0.557721	0.383906	0.843
Total Adenylate	976.206	1475.7	1401.44	248.522	83.4661	261.426	1085.18	550.57	519.637	290.177	0.397
Guanylate Energy Charge	0.210608	0.229586	0.346803	0.798323	0.128601	0.399973	0.170178	0.399377	0.465484	0.19768	0.909
Total Guanylate	304.116	169.875	118.312	43.7493	22.2626	72.5238	195.233	81.2365	109.568	61.7165	0.643
GSH/GSSG	9.52837	15.2542	1.57894	N.A.	0.238606	4.64934	20.6091	0.245496	4.37741	0.577152	0.915
Total Glutathione	4085.76	3067.34	1042.65	8.14588	280.037	1229.32	3206.09	355.793	963.355	996.721	0.723
NADPH/NADP+	0.824089	0.0971035	0.178183	0.51411	0.595099	0.664492	N.A.	0.454319	0.673924	0.53617	0.38
NADH/NAD+	0.152514	0.054672	0.0790886	0.0940692	0.0845236	0.0758756	0.0670042	0.0908864	0.0796586	0.0880476	0.658
Lactate/Pyruvate	766.861	1433.7	1861.83	489.571	411.812	559.444	926.06	405.809	887.483	158.283	0.248
Glycerol 3-phosphate/DHAP	8.05585	1.18977	2.27437	0.847412	2.732	1.02649	8.72927	2.14483	2.46346	2.20917	0.887
Total Amino Acids	39892.6	28708.9	21171	7495.48	9318.15	16432.2	39654.9	9243.5	10061.4	7351.08	0.591
Total Essential Amino Acids	7167.93	3694.31	3889.03	1418.74	3061.3	2279.84	5976	2361.02	1836.91	998.933	0.39
Total Non-essential Amino Acids	32724.7	25014.6	17281.9	6076.74	6256.85	14152.4	33678.9	6882.48	8224.45	6352.14	0.635
Total Glucogenic Amino Acids	37347.5	27433.1	19403.3	6935.6	8084.8	15644.3	37717.4	8257.64	9378.39	6974.79	0.616
Total Ketogenic Amino Acids	5870.04	3089.15	3151.86	1098.08	2418.79	1837.45	4830.79	1864.39	1434.33	767.589	0.378
Total BCAA	3056.5	1311.68	1778.83	651.044	1287.2	890.282	2319.08	1075.2	884.403	427.957	0.362
Total Aromatic Amino Acids	1218.98	541.183	526.124	197.995	506.272	360.163	942.737	369.479	281.766	142.429	0.434
Fischer's Ratio	2.50742	2.42373	3.381	3.28818	2.54252	2.47188	2.45994	2.91003	3.13879	3.0047	0.939
Total Glu-related Amino Acids	16916.4	13868.7	9334.64	3166.08	2954.26	8378.34	16159.8	3123.62	5406.7	3861.08	0.626
Total Pyr-related Amino Acids	16138.8	11045.8	7484.65	2500.37	3487.26	5473.6	17861.9	3471.2	2611.25	1980.02	0.646
Total Acetyl CoA-related Amino Acids	3297.43	1609.29	2175.47	710.934	1542.88	974.29	2518.61	1203.15	889.368	465.608	0.269
Total Fumarate-related Amino Acids	1076.42	469.566	449.869	169.515	427.109	330.119	822.953	330.451	244.668	123.842	0.462
Total Succinyl CoA-related Amino Acids	2025.02	875.826	1107.14	451.853	903.973	606.63	1602	697.994	588.317	299.536	0.386
Total Oxaloacetate-related Amino Acids	1190.83	1173.26	1027.01	647.783	312.209	855.611	1270.77	634.374	527.457	710.316	0.751
Malate/Asp	0.622233	0.677077	0.231279	0.251021	0.400345	0.480363	0.770069	0.236541	0.358859	0.217301	0.876
Citrulline/Ornithine	0.381108	0.27344	0.0298648	0.201671	0.302514	0.415162	0.576344	0.0887229	0.264257	0.328953	0.352
Glu/2-Oxoglutarate	674.955	N.A.	N.A.	N.A.	87.719	901.959	N.A.	290.126	N.A.	N.A.	-
G6P/R5P	0.977502	3.98529	11.0534	0.64861	2.11954	0.715156	0.568845	1.60029	0.59944	0.663788	0.205
SAM/SAH	2.27914	5.00695	5.62606	0.713778	1.92688	1.18981	5.13457	2.41082	1.57766	0.601723	0.475
Putrescine/Spermidine	3.00104	6.81378	2.44483	0.883494	N.A.	3.9342	8.09177	0.655812	1.21923	0.857949	0.872
PC, primary cancer; OMC, omental metastatic cancer; N.A., not available; P-value was calculated by Welch’s t-test.
